# Supplementary material for: Comprehensive Analysis of TRIM Family Genes in Hepatitis Virus B-Related Hepatoma Carcinoma
Source: Front Genet. 2022 Jul 7;13:913743. doi: 10.3389/fgene.2022.913743 (PMC9301387; doi:10.3389/fgene.2022.913743)
Supplement: Supplementary file 1 [file Table2.XLSX]

## Sheet: E3-共同-ORA_results
p-value	q-value	pathway	Number	source	external_id	members_input_overlap	members_input_overlap_geneids	size	effective_size
2.37124e-07	2.96404e-06	Immune System	19	Reactome	R-HSA-168256	MAP3K1; TRAF2; HACE1; DZIP3; HERC2; LNX1; UBE3B; TRIM3; HUWE1; TRIM36; RNF34; RNF4; CBL; RNF115; RNF41; RNF220; TRIP12; RNF19B; UBR1	10075; 197131; 57531; 80196; 9320; 55182; 27246; 8924; 89910; 9666; 10193; 867; 4214; 7186; 84708; 127544; 6047; 55521; 10612	1828	1827
4.64397e-16	2.32199e-14	Antigen processing: Ubiquitination & Proteasome degradation	15	Reactome	R-HSA-983168	TRIP12; HACE1; DZIP3; HERC2; LNX1; UBE3B; HUWE1; TRIM36; RNF34; RNF115; RNF41; RNF220; UBR1; RNF19B; RNF4	89910; 10075; 197131; 6047; 127544; 80196; 55182; 9666; 27246; 57531; 8924; 10193; 55521; 84708; 9320	265	265
6.35106e-15	1.58776e-13	Class I MHC mediated antigen processing & presentation	15	Reactome	R-HSA-983169	TRIP12; HACE1; DZIP3; HERC2; LNX1; UBE3B; HUWE1; TRIM36; RNF34; RNF115; RNF41; RNF220; UBR1; RNF19B; RNF4	89910; 10075; 197131; 6047; 80196; 55182; 9666; 27246; 127544; 57531; 8924; 10193; 55521; 84708; 9320	316	316
8.4191e-10	1.40318e-08	Adaptive Immune System	15	Reactome	R-HSA-1280218	HACE1; UBR1; DZIP3; HERC2; LNX1; UBE3B; HUWE1; TRIM36; RNF34; RNF115; RNF41; RNF220; RNF4; RNF19B; TRIP12	6047; 27246; 55521; 10075; 57531; 8924; 9320; 89910; 9666; 197131; 84708; 80196; 55182; 10193; 127544	719	719
0.0023252	0.00528454	Post-translational protein modification	11	Reactome	R-HSA-597592	BRCA1; TRAF2; RNF168; TRIM28; BARD1; RAD18; BMI1; RNF40; HERC2; HLTF; RNF20	56254; 672; 580; 8924; 9810; 648; 56852; 7186; 6596; 10155; 165918	1425	1425
0.0225512	0.0313212	Metabolism of proteins	11	Reactome	R-HSA-392499	BRCA1; TRAF2; RNF168; TRIM28; BARD1; RAD18; BMI1; RNF40; HERC2; HLTF; RNF20	56254; 672; 580; 8924; 9810; 648; 56852; 7186; 6596; 10155; 165918	1935	1934
3.93549e-06	1.78886e-05	DNA Repair	8	Reactome	R-HSA-73894	BRCA1; RNF168; BARD1; PRPF19; RAD18; HERC2; RNF8; RNF4	56852; 6047; 27339; 165918; 580; 8924; 672; 9025	323	322
4.05621e-07	4.05621e-06	Processing of DNA double-strand break ends	6	Reactome	R-HSA-5693607	BRCA1; BARD1; RNF168; HERC2; RNF8; RNF4	6047; 165918; 580; 8924; 672; 9025	99	98
2.4483e-06	1.62651e-05	HDR through Homologous Recombination (HRR) or Single Strand Annealing (SSA)	6	Reactome	R-HSA-5693567	BRCA1; BARD1; RNF168; HERC2; RNF8; RNF4	6047; 165918; 580; 672; 8924; 9025	134	133
3.16477e-06	1.62651e-05	Homology Directed Repair	6	Reactome	R-HSA-5693538	BRCA1; BARD1; RNF168; HERC2; RNF8; RNF4	6047; 165918; 580; 672; 8924; 9025	140	139
9.43982e-06	3.6307e-05	DNA Double-Strand Break Repair	6	Reactome	R-HSA-5693532	BRCA1; BARD1; RNF168; HERC2; RNF8; RNF4	6047; 165918; 580; 8924; 9025; 672	169	168
1.76597e-06	1.47164e-05	Nonhomologous End-Joining (NHEJ)	5	Reactome	R-HSA-5693571	BRCA1; RNF168; HERC2; RNF8; BARD1	8924; 672; 9025; 580; 165918	70	69
3.05111e-06	1.62651e-05	Recruitment and ATM-mediated phosphorylation of repair and signaling proteins at DNA double strand breaks	5	Reactome	R-HSA-5693565	BRCA1; BARD1; HERC2; RNF8; RNF168	8924; 9025; 165918; 580; 672	78	77
3.25301e-06	1.62651e-05	DNA Double Strand Break Response	5	Reactome	R-HSA-5693606	BRCA1; BARD1; HERC2; RNF8; RNF168	8924; 672; 9025; 165918; 580	79	78
8.60409e-06	3.58504e-05	G2/M DNA damage checkpoint	5	Reactome	R-HSA-69473	BRCA1; RNF168; RNF8; HERC2; BARD1	165918; 580; 8924; 672; 9025	96	95
2.57425e-05	9.08353e-05	G2/M Checkpoints	5	Reactome	R-HSA-69481	BRCA1; RNF168; RNF8; HERC2; BARD1	165918; 580; 8924; 672; 9025	120	119
0.000169919	0.000471996	SUMO E3 ligases SUMOylate target proteins	5	Reactome	R-HSA-3108232	BRCA1; RNF168; TRIM28; BMI1; HERC2	10155; 648; 165918; 8924; 672	177	177
0.000193507	0.00050923	SUMOylation	5	Reactome	R-HSA-2990846	BRCA1; RNF168; TRIM28; BMI1; HERC2	10155; 648; 165918; 8924; 672	182	182
0.000799385	0.00199846	Cell Cycle Checkpoints	5	Reactome	R-HSA-69620	BRCA1; RNF168; RNF8; HERC2; BARD1	165918; 580; 672; 8924; 9025	249	248
0.0359458	0.0460843	Cell Cycle	5	Reactome	R-HSA-1640170	BRCA1; RNF168; RNF8; HERC2; BARD1	580; 165918; 8924; 9025; 672	622	621
2.72506e-05	9.08353e-05	E3 ubiquitin ligases ubiquitinate target proteins	4	Reactome	R-HSA-8866654	HLTF; RAD18; RNF20; RNF40	9810; 56254; 56852; 6596	59	59
8.19998e-05	0.000256249	SUMOylation of DNA damage response and repair proteins	4	Reactome	R-HSA-3108214	BRCA1; HERC2; BMI1; RNF168	8924; 648; 672; 165918	78	78
9.05304e-05	0.000266266	Protein ubiquitination	4	Reactome	R-HSA-8852135	HLTF; RAD18; RNF20; RNF40	9810; 56254; 56852; 6596	80	80
0.012474	0.0194907	Regulation of TP53 Activity	3	Reactome	R-HSA-5633007	BRCA1; RNF34; BARD1	580; 672; 80196	163	163
0.00101033	0.00240555	TRAF6 mediated NF-kB activation	2	Reactome	R-HSA-933542	TRAF2; MAP3K1	7186; 4214	16	16
0.00289468	0.00629279	Resolution of D-loop Structures through Synthesis-Dependent Strand Annealing (SDSA)	2	Reactome	R-HSA-5693554	BRCA1; BARD1	672; 580	27	27
0.0043056	0.00897	Resolution of D-loop Structures through Holliday Junction Intermediates	2	Reactome	R-HSA-5693568	BRCA1; BARD1	672; 580	33	33
0.00483377	0.00929572	Transcriptional Regulation by E2F6	2	Reactome	R-HSA-8953750	BRCA1; BMI1	648; 672	35	35
0.00483377	0.00929572	Resolution of D-Loop Structures	2	Reactome	R-HSA-5693537	BRCA1; BARD1	672; 580	35	35
0.00510852	0.00946022	Metalloprotease DUBs	2	Reactome	R-HSA-5689901	BRCA1; BARD1	672; 580	36	36
0.00539031	0.00962556	HDR through Single Strand Annealing (SSA)	2	Reactome	R-HSA-5685938	BRCA1; BARD1	672; 580	37	37
0.00597487	0.0103015	Presynaptic phase of homologous DNA pairing and strand exchange	2	Reactome	R-HSA-5693616	BRCA1; BARD1	672; 580	39	39
0.00690353	0.0115059	Homologous DNA Pairing and Strand Exchange	2	Reactome	R-HSA-5693579	BRCA1; BARD1	672; 580	42	42
0.00858669	0.0138495	SUMOylation of transcription cofactors	2	Reactome	R-HSA-3899300	TRIM28; BMI1	10155; 648	47	47
0.0141606	0.0214555	DDX58/IFIH1-mediated induction of interferon-alpha/beta	2	Reactome	R-HSA-168928	TRAF2; MAP3K1	4214; 7186	61	61
0.0173985	0.024855	HDR through Homologous Recombination (HRR)	2	Reactome	R-HSA-5685942	BRCA1; BARD1	580; 672	68	68
0.0173985	0.024855	Signaling by TGF-beta Receptor Complex	2	Reactome	R-HSA-170834	TRIM33; CBL	867; 51592	68	68
0.0311889	0.0421471	Regulation of TP53 Activity through Phosphorylation	2	Reactome	R-HSA-6804756	BRCA1; BARD1	580; 672	93	93
0.0330603	0.0435003	Signaling by TGFB family members	2	Reactome	R-HSA-9006936	TRIM33; CBL	51592; 867	96	96
