# Supplementary material for: Comprehensive Analysis of TRIM Family Genes in Hepatitis Virus B-Related Hepatoma Carcinoma
Source: Front Genet. 2022 Jul 7;13:913743. doi: 10.3389/fgene.2022.913743 (PMC9301387; doi:10.3389/fgene.2022.913743)
Supplement: Supplementary file 2 [file Table3.XLSX]

## Sheet: E3-interaction-gongtong-pathway
p-value	q-value	pathway	Numbers	source	external_id	members_input_overlap	members_input_overlap_geneids	size	effective_size
0.0102487	0.0213515	Post-translational protein modification	4	Reactome	R-HSA-597592	TRAF2; RNF168; TRIM28; RNF20	56254; 7186; 10155; 165918	1425	1425
0.0243428	0.0357982	Immune System	4	Reactome	R-HSA-168256	RNF220; TRAF2; TRIM3; RNF41	55182; 10193; 7186; 10612	1828	1827
0.0295201	0.0410001	Metabolism of proteins	4	Reactome	R-HSA-392499	TRAF2; RNF168; TRIM28; RNF20	56254; 7186; 10155; 165918	1935	1934
0.000914465	0.00917056	Nonhomologous End-Joining (NHEJ)	2	Reactome	R-HSA-5693571	RNF168; RNF8	9025; 165918	70	69
0.00113738	0.00917056	Recruitment and ATM-mediated phosphorylation of repair and signaling proteins at DNA double strand breaks	2	Reactome	R-HSA-5693565	RNF168; RNF8	9025; 165918	78	77
0.0011669	0.00917056	DNA Double Strand Break Response	2	Reactome	R-HSA-5693606	RNF168; RNF8	9025; 165918	79	78
0.00172478	0.00917056	G2/M DNA damage checkpoint	2	Reactome	R-HSA-69473	RNF168; RNF8	165918; 9025	96	95
0.00183411	0.00917056	Processing of DNA double-strand break ends	2	Reactome	R-HSA-5693607	RNF168; RNF8	165918; 9025	99	98
0.00268958	0.0112066	G2/M Checkpoints	2	Reactome	R-HSA-69481	RNF168; RNF8	165918; 9025	120	119
0.0033463	0.0114019	HDR through Homologous Recombination (HRR) or Single Strand Annealing (SSA)	2	Reactome	R-HSA-5693567	RNF168; RNF8	165918; 9025	134	133
0.0036486	0.0114019	Homology Directed Repair	2	Reactome	R-HSA-5693538	RNF168; RNF8	165918; 9025	140	139
0.00528292	0.014029	DNA Double-Strand Break Repair	2	Reactome	R-HSA-5693532	RNF168; RNF8	165918; 9025	169	168
0.00584754	0.014029	SUMO E3 ligases SUMOylate target proteins	2	Reactome	R-HSA-3108232	RNF168; TRIM28	10155; 165918	177	177
0.00617278	0.014029	SUMOylation	2	Reactome	R-HSA-2990846	RNF168; TRIM28	10155; 165918	182	182
0.0112175	0.0215721	Cell Cycle Checkpoints	2	Reactome	R-HSA-69620	RNF168; RNF8	165918; 9025	249	248
0.0127357	0.0227423	Antigen processing: Ubiquitination & Proteasome degradation	2	Reactome	R-HSA-983168	RNF220; RNF41	55182; 10193	265	265
0.0178012	0.028822	Class I MHC mediated antigen processing & presentation	2	Reactome	R-HSA-983169	RNF220; RNF41	55182; 10193	316	316
0.0184461	0.028822	DNA Repair	2	Reactome	R-HSA-73894	RNF168; RNF8	165918; 9025	323	322
0.0375043	0.0493478	Cytokine Signaling in Immune system	2	Reactome	R-HSA-1280215	TRAF2; TRIM3	7186; 10612	471	471
