# Supplementary material for: Comprehensive Analysis of TRIM Family Genes in Hepatitis Virus B-Related Hepatoma Carcinoma
Source: Front Genet. 2022 Jul 7;13:913743. doi: 10.3389/fgene.2022.913743 (PMC9301387; doi:10.3389/fgene.2022.913743)
Supplement: Supplementary file 3 [file Table4.XLSX]

## Sheet: innate immune molecules-gongton
p-value	q-value	pathway	Number	source	external_id	members_input_overlap	members_input_overlap_geneids	size	effective_size
0.000560948	0.00200491	TNF signaling	4	Reactome	R-HSA-75893	TRAF1; TRAF2; CYLD; ADAM17	6868; 1540; 7185; 7186	34	34
0.00272094	0.00613956	Regulation of TNFR1 signaling	3	Reactome	R-HSA-5357905	TRAF1; TRAF2; CYLD	1540; 7185; 7186	25	25
0.0188863	0.0275468	TNFR2 non-canonical NF-kB pathway	3	Reactome	R-HSA-5668541	TRAF2; TNFRSF13B; TNFSF4	7292; 23495; 7186	50	50
0.000594964	0.00201372	Apoptosis	7	Reactome	R-HSA-109581	TRAF2; PPP3R1; CTNNB1; CD14; MAPK1; DNM1L; BCL2	929; 5594; 596; 5534; 1499; 7186; 10059	127	127
0.00115002	0.0034113	Programmed Cell Death	7	Reactome	R-HSA-5357801	TRAF2; PPP3R1; CTNNB1; CD14; MAPK1; DNM1L; BCL2	929; 5594; 596; 5534; 1499; 7186; 10059	142	142
0.000818445	0.00257226	Death Receptor Signalling	7	Reactome	R-HSA-73887	HDAC1; TRAF1; TRAF2; CASP2; SQSTM1; CYLD; ADAM17	3065; 1540; 7185; 6868; 835; 8878; 7186	134	134
0.0134023	0.0199899	TP53 Regulates Transcription of Cell Death Genes	3	Reactome	R-HSA-5633008	CASP2; BNIP3L; CASP1	665; 835; 834	44	44
0.0209511	0.0300603	Intrinsic Pathway for Apoptosis	3	Reactome	R-HSA-109606	MAPK1; PPP3R1; BCL2	596; 5534; 5594	52	52
0.000507624	0.00194221	Interferon Signaling	8	Reactome	R-HSA-913531	ADAR; EIF2AK2; PIAS1; PTPN11; IFNGR2; JAK1; PTPN2; PTPN6	3460; 103; 5781; 8554; 3716; 5777; 5610; 5771	162	162
5.29626e-09	1.2711e-07	Regulation of IFNG signaling	6	Reactome	R-HSA-877312	PTPN11; PIAS1; IFNGR2; JAK1; PTPN2; PTPN6	3460; 5781; 5777; 8554; 3716; 5771	14	14
0.000762779	0.00242619	Interferon gamma signaling	6	Reactome	R-HSA-877300	PTPN11; PIAS1; IFNGR2; JAK1; PTPN2; PTPN6	8554; 5771; 3460; 5781; 3716; 5777	96	96
0.00893642	0.0141752	Interferon alpha/beta signaling	4	Reactome	R-HSA-909733	ADAR; PTPN11; PTPN6; JAK1	103; 3716; 5777; 5781	72	72
0.00305054	0.00660118	Regulation of IFNA signaling	3	Reactome	R-HSA-912694	PTPN11; PTPN6; JAK1	3716; 5777; 5781	26	26
0.00498666	0.00877652	DDX58/IFIH1-mediated induction of interferon-alpha/beta	3	Reactome	R-HSA-168928	TRAF2; MAP3K1; TBK1; IKBKE	29110; 9641; 4214; 7186	61	61
0.00465153	0.00838438	SUMOylation	9	Reactome	R-HSA-2990846	HDAC1; TRIM28; SENP2; PIAS2; PIAS3; PIAS1; IKBKE	9063; 3065; 8554; 10155; 9641; 10401; 59343	182	182
0.0153504	0.0226398	SUMO E3 ligases SUMOylate target proteins	6	Reactome	R-HSA-3108232	HDAC1; TRIM28; PIAS2; PIAS3; PIAS1; IKBKE	9063; 3065; 10155; 8554; 9641; 10401	177	177
0.00192544	0.00479542	SUMOylation of transcription cofactors	4	Reactome	R-HSA-3899300	PIAS2; PIAS3; PIAS1; TRIM28	10401; 9063; 10155; 8554	47	47
0.0014056	0.00393287	SUMOylation of transcription factors	3	Reactome	R-HSA-3232118	PIAS2; PIAS3; PIAS1	10401; 9063; 8554	20	20
0.00378076	0.00718072	SUMOylation of intracellular receptors	3	Reactome	R-HSA-4090294	PIAS2; PIAS3; PIAS1	10401; 9063; 8554	28	28
0.0480908	0.0628513	SUMOylation of chromatin organization proteins	3	Reactome	R-HSA-4551638	PIAS2; HDAC1; PIAS1	9063; 8554; 3065	72	72
2.49283e-09	6.58106e-08	Toll-like Receptor Cascades	13	Reactome	R-HSA-168898	CTSK; MAP3K1; TBK1; TLR5; CREB1; TLR10; CD14; MAPK1; NOD1; IKBKE; PIK3C3; BTK; ATF2	929; 5289; 1386; 5594; 1385; 81793; 9641; 695; 10392; 7100; 29110; 4214; 1513	130	130
4.88547e-06	6.44882e-05	Toll Like Receptor 4 (TLR4) Cascade	9	Reactome	R-HSA-166016	TBK1; MAP3K1; CREB1; CD14; MAPK1; NOD1; IKBKE; BTK; ATF2	929; 1386; 5594; 1385; 9641; 695; 10392; 29110; 4214	112	112
2.56239e-05	0.000241597	Toll Like Receptor 10 (TLR10) Cascade	7	Reactome	R-HSA-168142	MAP3K1; CREB1; TLR10; MAPK1; NOD1; TLR5; ATF2	10392; 4214; 1386; 1385; 5594; 81793; 7100	77	77
2.56239e-05	0.000241597	Toll Like Receptor 5 (TLR5) Cascade	7	Reactome	R-HSA-168176	MAP3K1; CREB1; TLR10; MAPK1; NOD1; TLR5; ATF2	10392; 4214; 1386; 1385; 5594; 81793; 7100	77	77
6.5567e-05	0.000498857	TRIF(TICAM1)-mediated TLR4 signaling	7	Reactome	R-HSA-937061	TBK1; CREB1; CD14; MAPK1; NOD1; IKBKE; ATF2	929; 1386; 5594; 1385; 9641; 10392; 29110	89	89
7.04303e-05	0.000498857	MyD88-independent TLR4 cascade	7	Reactome	R-HSA-166166	TBK1; CREB1; CD14; MAPK1; NOD1; IKBKE; ATF2	929; 1386; 5594; 1385; 9641; 10392; 29110	90	90
7.55844e-05	0.000498857	Toll Like Receptor TLR1:TLR2 Cascade	7	Reactome	R-HSA-168179	MAP3K1; CREB1; CD14; MAPK1; NOD1; BTK; ATF2	929; 1386; 5594; 1385; 10392; 4214; 695	91	91
7.55844e-05	0.000498857	Toll Like Receptor TLR6:TLR2 Cascade	7	Reactome	R-HSA-168188	MAP3K1; CREB1; CD14; MAPK1; NOD1; BTK; ATF2	929; 1386; 5594; 1385; 10392; 4214; 695	91	91
7.55844e-05	0.000498857	Toll Like Receptor 2 (TLR2) Cascade	7	Reactome	R-HSA-181438	MAP3K1; CREB1; CD14; MAPK1; NOD1; BTK; ATF2	929; 1386; 5594; 1385; 10392; 4214; 695	91	91
0.000286692	0.00125458	Toll Like Receptor 9 (TLR9) Cascade	6	Reactome	R-HSA-168138	MAP3K1; CREB1; MAPK1; NOD1; PIK3C3; ATF2	10392; 4214; 5594; 1386; 1385; 5289	80	80
0.000451549	0.00175307	Toll Like Receptor 3 (TLR3) Cascade	6	Reactome	R-HSA-168164	TBK1; CREB1; MAPK1; NOD1; IKBKE; ATF2	1386; 5594; 1385; 9641; 10392; 29110	87	87
0.00199691	0.00492695	Toll Like Receptor 7/8 (TLR7/8) Cascade	5	Reactome	R-HSA-168181	MAPK1; MAP3K1; NOD1; CREB1; ATF2	10392; 4214; 5594; 1386; 1385	79	79
3.11319e-13	2.05471e-11	Signaling by Interleukins	21	Reactome	R-HSA-449147	CSF2RB; JAK3; PIK3CA; IL2RG; INPP5D; CASP1; IL10; MAP3K3; PTPN11; JAK1; PIK3CD; IL15; CBL; SQSTM1; MAPK1; NOD1; CREB1; IL1RAP; SMARCA4; PTPN6; ATF2	1386; 5594; 1385; 1439; 867; 6597; 3600; 3718; 3556; 3635; 5781; 4215; 10392; 834; 8878; 3716; 5777; 5293; 3586; 5290; 3561	240	240
4.55533e-11	2.40521e-09	Interleukin-3, Interleukin-5 and GM-CSF signaling	10	Reactome	R-HSA-512988	CSF2RB; INPP5D; IL2RG; PIK3CA; PTPN11; PIK3CD; CBL; JAK3; JAK1; PTPN6	867; 3716; 5777; 5781; 5293; 3718; 3561; 3635; 1439; 5290	44	44
4.85636e-10	1.6026e-08	Interleukin-2 family signaling	9	Reactome	R-HSA-451927	CSF2RB; INPP5D; IL2RG; PIK3CA; PIK3CD; IL15; JAK3; JAK1; PTPN6	3716; 5777; 5293; 3600; 3718; 3561; 3635; 1439; 5290	40	40
0.00102003	0.0030688	Interleukin-1 family signaling	5	Reactome	R-HSA-446652	SQSTM1; CASP1; NOD1; MAP3K3; IL1RAP	8878; 3556; 4215; 10392; 834	68	68
0.00624873	0.01038	Interleukin-17 signaling	5	Reactome	R-HSA-448424	MAPK1; NOD1; CREB1; ATF2	10392; 1386; 1385; 5594	65	65
1.06462e-06	1.56144e-05	Interleukin-15 signaling	4	Reactome	R-HSA-8983432	IL2RG; IL15; JAK3; JAK1	3718; 3716; 3600; 3561	8	8
0.000193993	0.00100042	Interleukin-7 signaling	4	Reactome	R-HSA-1266695	IL2RG; SMARCA4; JAK3; JAK1	3716; 6597; 3718; 3561	26	26
0.00242182	0.00560843	Interleukin-1 signaling	4	Reactome	R-HSA-9020702	SQSTM1; IL1RAP; NOD1; MAP3K3	8878; 4215; 10392; 3556	50	50
0.000113482	0.000665763	Interleukin-9 signaling	3	Reactome	R-HSA-8985947	IL2RG; JAK3; JAK1	3718; 3716; 3561	9	9
0.00021923	0.0010523	Interleukin-6 signaling	3	Reactome	R-HSA-1059683	PTPN11; CBL; JAK1	867; 5781; 3716	11	11
0.000289884	0.00125458	Interleukin-2 signaling	3	Reactome	R-HSA-9020558	IL2RG; JAK3; JAK1	3718; 3716; 3561	12	12
0.000584766	0.00200491	Interleukin-4 and Interleukin-13 signaling	3	Reactome	R-HSA-6785807	IL2RG; JAK3; JAK1	3718; 3716; 3561	15	15
0.00102293	0.0030688	Interleukin-20 family signaling	3	Reactome	R-HSA-8854691	PTPN11; JAK3; JAK1	5781; 3718; 3716	18	18
0.00186761	0.00474561	Interleukin-6 family signaling	3	Reactome	R-HSA-6783589	PTPN11; CBL; JAK1	867; 3716; 5781	22	22
2.55542e-32	6.74632e-30	Immune System	82	Reactome	R-HSA-168256	CSF2RB; BTN3A3; PPP3R1; BTN3A1; IKBKE; PLAUR; IL1RAP; TRIM36; CLTC; PRKDC; TLR10; C8A; C8B; ITGAV; IFNGR2; ADAM17; CD200; PTPN2; SMARCA4; AHSG; HACE1; SKP2; TBK1; CD81; MAP3K3; ADAR; MAP3K1; NRAS; IFI16; IMPDH2; PTPN6; DOK3; CTNNB1; MAPK1; NOD1; JAK3; JAK1; CYLD; ZBP1; TRPM2; TNFSF4; ITGB1; DHX9; TRAF2; CTSK; SIRPA; SQSTM1; TLR5; RNF41; C1S; DHX36; PIK3CD; CREB1; SIGLEC10; CD200R1; ITPR3; VASP; P…	929; 3460; 6502; 11119; 834; 1660; 3615; 27181; 7226; 731; 5534; 57531; 81793; 1540; 3004; 732; 3688; 3718; 103; 8915; 29110; 3586; 5289; 5329; 6868; 7408; 5777; 4893; 1386; 23547; 102; 5610; 131450; 4345; 3556; 3635; 4215; 1513; 79865; 5594; 140885; 1439; 79930; 10193; 695; 867; 6597; 4214; 27040; 3710; 10392; 3685; 23495; 7186; 3600; 9641; 716; 5293; 3561; 5290; 8554; 975; 5781; 5771; 10384; 88…	1828	1827
3.02364e-08	6.65201e-07	Signal Transduction	56	Reactome	R-HSA-162582	CSF2RB; HDAC1; SPHK1; PPP3R1; PIK3CD; ADAM17; ADAM10; EZH2; ITGAV; CLTC; CCR7; PTPN2; SMARCA4; FZD1; CCDC88A; NRAS; GATA3; PIK3CG; KDM4A; MAPK1; JAK3; JAK1; EDN1; SPP1; ITGB1; TRAF1; TRAF2; PRKCA; CTNNB1; PRMT1; CREB1; REST; LAT; PIK3CA; ITPR3; PIK3C3; PTPN6; RNF41; SQSTM1; CASP2; PPP1CC; IL2RG; PTPN11; GSK3A; CBL; GSK3B; PLG; MFN1; ARHGAP15; CYLD; ABCA1; HDAC11; BCL2; GLI1; BTK; ATF2	55704; 8321; 5534; 9682; 3561; 19; 5294; 1540; 79885; 3688; 8877; 7185; 2146; 3718; 5289; 55669; 6696; 5777; 4893; 55843; 1236; 695; 102; 1386; 5594; 1439; 2931; 5501; 867; 6597; 3065; 27040; 3710; 6868; 3685; 7186; 5293; 5290; 5978; 5781; 3276; 2932; 5771; 5578; 8878; 1499; 596; 5340; 1213; 10193; 1385; 835; 2735; 3716; 1906; 2625	2432	2431
2.60217e-15	2.28991e-13	Innate Immune System	45	Reactome	R-HSA-168249	PPP3R1; PLAUR; PRKDC; CTNNB1; C8A; C8B; AHSG; IKBKE; DHX36; TBK1; CD81; ZBP1; MAP3K1; NRAS; IMPDH2; BCL10; DOK3; IFI16; MAPK1; NOD1; TRPM2; DHX9; TRAF2; CTSK; SIRPA; CREB1; C1S; PIK3CA; ITPR3; PIK3C3; PTPN6; TLR10; ADAM10; CASP2; CASP1; GZMM; ITGAV; CD14; CYLD; TLR5; LAT; SIGLEC5; BCL2; BTK; ATF2	3428; 929; 5289; 5329; 81793; 834; 5777; 1499; 4214; 1386; 1660; 4893; 731; 27040; 3710; 5534; 10392; 7100; 732; 197; 3685; 7186; 1540; 5591; 1385; 81030; 3004; 835; 716; 3615; 1513; 5290; 102; 5594; 140885; 79930; 9641; 170506; 596; 975; 8915; 8778; 29110; 7226; 695	1065	1064
1.1436e-15	1.50955e-13	Cytokine Signaling in Immune system	31	Reactome	R-HSA-1280215	CSF2RB; NRAS; IFNGR2; ADAM17; SMARCA4; MAP3K3; ADAR; PIK3CD; MAPK1; NOD1; JAK3; JAK1; TNFSF4; TRAF2; CREB1; IL1RAP; PTPN2; TNFRSF13B; PTPN6; SQSTM1; IL2RG; INPP5D; CASP1; IL10; PTPN11; EIF2AK2; IL15; CBL; PIAS1; PIK3CA; ATF2	6868; 867; 3460; 6597; 834; 8878; 5777; 4893; 5293; 1385; 3561; 10392; 5610; 23495; 7186; 3600; 3635; 4215; 1386; 3716; 3556; 5290; 8554; 5594; 1439; 3718; 103; 5781; 7292; 5771; 3586	471	471
3.96148e-10	1.55786e-08	Adaptive Immune System	30	Reactome	R-HSA-1280218	BTN3A3; PPP3R1; BTN3A1; NRAS; TRIM36; CLTC; CD200; HACE1; SKP2; CD81; PIK3CA; PIK3CD; BCL10; CD200R1; ITGB1; CTSK; RNF41; SIGLEC10; ITPR3; VASP; PTPN6; INPP5D; PTPN11; ITGAV; TREML2; SIGLEC8; LAT; SIGLEC5; LILRA4; BTK	7408; 6502; 11119; 10384; 5777; 4893; 55521; 5293; 27181; 27040; 3710; 4345; 5534; 23547; 57531; 89790; 3685; 131450; 3635; 1513; 5290; 3688; 79865; 975; 5781; 1213; 10193; 8915; 8778; 695	719	719
1.24535e-06	1.73038e-05	Disease	30	Reactome	R-HSA-1643685	HDAC1; PIK3CD; ADAM10; EZH2; IFNGR2; ADAM17; AP3B1; TBK1; PIK3CA; NRAS; IMPDH2; MAPK1; JAK3; JAK1; ITGB1; CREB1; REST; ITPR3; CTNNB1; PPP1CC; CASP1; IL10; PTPN11; EIF2AK2; GSK3A; CBL; GSK3B; ZBP1; HDAC11; BTK	6868; 867; 3460; 5501; 834; 5293; 3065; 4893; 3710; 8546; 102; 1385; 79885; 81030; 3716; 1499; 3615; 5290; 3688; 2146; 5594; 2931; 5978; 3718; 5781; 29110; 2932; 5610; 3586; 695	1029	1029
5.86482e-07	9.10772e-06	Hemostasis	24	Reactome	R-HSA-109582	HDAC1; PLAUR; ITGA3; PTPN6; AHSG; AKAP10; VPS45; PIK3CA; NRAS; PIK3CG; MAPK1; ITGB1; SIRPA; SOD1; PRKCA; ITPR3; F11; GATA3; INPP5D; PTPN11; ITGAV; PLG; MFN1; LAT	5578; 5329; 55669; 5777; 4893; 2160; 27040; 3710; 5294; 197; 6647; 3685; 3065; 3635; 3675; 11311; 5340; 5290; 3688; 5594; 140885; 2625; 5781; 11216	677	677
2.303e-09	6.58106e-08	Signaling by Receptor Tyrosine Kinases	23	Reactome	R-HSA-9006934	SPHK1; ADAM10; ITGAV; CLTC; ADAM17; PTPN2; PIK3CA; NRAS; MAPK1; ITGB1; PRKCA; CREB1; RNF41; ITPR3; PIK3C3; PTPN6; CTNNB1; PTPN11; CBL; PLG; SPP1; REST; ATF2	5578; 6868; 867; 5289; 6696; 5777; 1499; 4893; 1386; 3710; 102; 3685; 1213; 1385; 5340; 5290; 3688; 8877; 5594; 5978; 5781; 10193; 5771	464	464
3.63683e-05	0.000318012	Infectious disease	22	Reactome	R-HSA-5663205	HDAC1; CTNNB1; EZH2; IFNGR2; ADAM17; TBK1; ZBP1; IMPDH2; MAPK1; JAK3; JAK1; ITGB1; CREB1; REST; ITPR3; CASP1; IL10; EIF2AK2; GSK3A; CBL; GSK3B; BTK	6868; 867; 3460; 3718; 834; 1499; 3065; 3710; 5610; 1385; 2146; 81030; 3716; 3615; 3688; 5594; 2931; 5978; 29110; 2932; 3586; 695	750	750
0.0430748	0.0568588	Generic Transcription Pathway	20	Reactome	R-HSA-212436	TRIM28; HDAC1; CTSK; EHMT2; BNIP3L; CASP1; PTPN11; PRMT1; CASP2; CREB1; GSK3B; CTNNB1; MAPK1; EZH2; SMARCE1; HDAC11; SKP2; SMARCA4; GATA3; ATF2	10155; 6502; 665; 6597; 834; 2625; 10919; 1386; 1385; 6605; 3065; 79885; 2146; 835; 1499; 1513; 5594; 5781; 3276; 2932	1178	1177
4.92655e-07	8.1288e-06	Diseases of signal transduction by growth factor receptors and second messengers	15	Reactome	R-HSA-5663202	HDAC1; AP3B1; PPP1CC; PIK3CD; PTPN11; NRAS; GSK3A; CBL; GSK3B; ADAM10; PIK3CA; MAPK1; CREB1; ADAM17; HDAC11	3065; 5501; 1385; 5594; 867; 79885; 2931; 8546; 6868; 2932; 102; 5293; 4893; 5781; 5290	274	274
0.00965132	0.0150766	Developmental Biology	15	Reactome	R-HSA-1266738	ITGB1; RPS6KA4; CEBPE; PRKCA; FLI1; PTPN11; NRAS; CREB1; GSK3B; CTNNB1; MAPK1; ITGAV; CLTC; VASP; SMARCA4	5578; 7408; 6597; 1499; 4893; 1385; 3685; 2313; 8986; 3688; 5594; 1053; 5781; 1213; 2932	676	676
7.62227e-06	9.14672e-05	Intracellular signaling by second messengers	13	Reactome	R-HSA-9006925	HDAC1; PRKCA; PIK3CD; PTPN11; GSK3A; CREB1; GSK3B; PIK3CA; EZH2; REST; ITPR3; MAPK1; ATF2	1385; 3065; 5578; 2146; 1386; 5594; 2931; 5978; 3710; 5781; 2932; 5293; 5290	259	259
0.00343359	0.00681555	G-protein mediated events	13	Reactome	R-HSA-112040	PRKCA; ITPR3; MAPK1; CREB1	5578; 3710; 5594; 1385	55	55
0.000128233	0.000735944	Signaling by Nuclear Receptors	12	Reactome	R-HSA-9006931	HDAC1; SPHK1; PIK3CA; PRMT1; NRAS; CREB1; KDM4A; MAPK1; ABCA1; BCL2; GATA3; ATF2	596; 1386; 5594; 3065; 1385; 2625; 9682; 19; 3276; 8877; 4893; 5290	295	294
0.00125127	0.0036704	Nervous system development	12	Reactome	R-HSA-9675108	ITGB1; RPS6KA4; PRKCA; PTPN11; NRAS; ITGAV; GSK3B; MAPK1; CREB1; CLTC; VASP; SMARCA4	5578; 7408; 6597; 4893; 8986; 3685; 1385; 3688; 5594; 5781; 1213; 2932	379	379
4.85105e-08	9.85137e-07	SARS-CoV Infections	11	Reactome	R-HSA-9679506	HDAC1; ITGB1; TBK1; ZBP1; GSK3A; REST; GSK3B; IMPDH2; JAK3; IFNGR2; JAK1	3065; 3460; 5978; 2931; 81030; 3718; 3716; 29110; 2932; 3615; 3688	111	111
3.73423e-05	0.000318012	PIP3 activates AKT signaling	11	Reactome	R-HSA-1257604	HDAC1; GSK3A; PTPN11; PIK3CD; CREB1; GSK3B; MAPK1; REST; PIK3CA; EZH2; ATF2	5293; 3065; 2146; 1386; 5594; 1385; 2931; 5978; 5781; 2932; 5290	218	218
0.000199288	0.00100042	Platelet activation, signaling and aggregation	11	Reactome	R-HSA-76002	SOD1; PRKCA; PIK3CA; PTPN11; PIK3CG; PLG; MAPK1; AHSG; LAT; ITPR3; PTPN6	5594; 5578; 27040; 3710; 5781; 5294; 5777; 5340; 197; 6647; 5290	263	263
0.000258163	0.0011957	Chromatin modifying enzymes	11	Reactome	R-HSA-3247509	HDAC1; EHMT2; JMJD6; DR1; PRMT1; REST; KDM4A; EZH2; SMARCE1; SMARCA4; ATF2	2146; 1386; 6597; 5978; 1810; 9682; 3065; 3276; 23210; 6605; 10919	271	271
0.000258163	0.0011957	Chromatin organization	11	Reactome	R-HSA-4839726	HDAC1; EHMT2; JMJD6; DR1; PRMT1; REST; KDM4A; EZH2; SMARCE1; SMARCA4; ATF2	2146; 1386; 6597; 5978; 1810; 9682; 3065; 3276; 23210; 6605; 10919	271	271
0.00240734	0.00560843	Axon guidance	11	Reactome	R-HSA-422475	ITGB1; RPS6KA4; PRKCA; PTPN11; NRAS; CREB1; GSK3B; MAPK1; ITGAV; CLTC; VASP	5578; 7408; 4893; 8986; 3685; 1385; 3688; 5594; 5781; 1213; 2932	356	356
0.000172564	0.000914988	ESR-mediated signaling	10	Reactome	R-HSA-8939211	HDAC1; SPHK1; PIK3CA; PRMT1; NRAS; CREB1; MAPK1; BCL2; GATA3; ATF2	8877; 3065; 1386; 5594; 1385; 2625; 596; 3276; 4893; 5290	217	216
0.00506087	0.00878993	Downstream signaling of activated FGFR1	9	Reactome	R-HSA-5654687	PIK3CA; PTPN11; NRAS	5781; 4893; 5290	31	31
2.80354e-07	4.95951e-06	Potential therapeutics for SARS	9	Reactome	R-HSA-9679191	HDAC1; ITGB1; TBK1; ZBP1; REST; IMPDH2; JAK3; IFNGR2; JAK1	3065; 3716; 29110; 5978; 3688; 81030; 3460; 3718; 3615	80	80
5.12391e-05	0.000422722	Fc epsilon receptor (FCERI) signaling	9	Reactome	R-HSA-2454202	PPP3R1; PIK3CA; MAP3K1; NRAS; MAPK1; LAT; ITPR3; BCL10; BTK	8915; 5594; 27040; 5534; 3710; 4893; 4214; 5290; 695	150	150
0.000757812	0.00242619	Cell surface interactions at the vascular wall	9	Reactome	R-HSA-202733	ITGB1; INPP5D; SIRPA; PIK3CA; PTPN11; ITGA3; NRAS; ITGAV; PTPN6	4893; 140885; 3635; 5781; 3675; 5777; 3685; 5290; 3688	215	215
0.000757812	0.00242619	Immunoregulatory interactions between a Lymphoid and a non-Lymphoid cell	9	Reactome	R-HSA-198933	ITGB1; CD81; TREML2; SIGLEC8; SIGLEC10; SIGLEC5; CD200; CD200R1; LILRA4	79865; 975; 27181; 4345; 131450; 23547; 8778; 89790; 3688	215	215
0.00141524	0.00393287	RAF/MAP kinase cascade	9	Reactome	R-HSA-5673001	CSF2RB; PPP1CC; IL2RG; PIK3CA; NRAS; MAPK1; JAK3; JAK1; LAT	5501; 5594; 1439; 3718; 3716; 4893; 27040; 3561; 5290	235	235
0.00145741	0.00400788	MAPK1/MAPK3 signaling	9	Reactome	R-HSA-5684996	CSF2RB; PPP1CC; IL2RG; PIK3CA; NRAS; MAPK1; JAK3; JAK1; LAT	5501; 5594; 1439; 3718; 3716; 4893; 27040; 3561; 5290	236	236
0.00349983	0.00689519	Neutrophil degranulation	9	Reactome	R-HSA-6798695	SIRPA; DOK3; PLAUR; NRAS; IMPDH2; ADAM10; ITGAV; CD14; MAPK1; AHSG; SIGLEC5; PTPN6; TRPM2	929; 5329; 5777; 4893; 102; 197; 3615; 3685; 5594; 140885; 8778; 79930; 7226	487	486
4.13068e-10	1.55786e-08	Interleukin receptor SHC signaling	8	Reactome	R-HSA-912526	CSF2RB; INPP5D; IL2RG; PIK3CA; PIK3CD; JAK3; JAK1; PTPN6	3716; 5777; 5293; 3718; 3561; 3635; 1439; 5290	27	27
9.608e-05	0.000589886	Signaling by NTRKs	8	Reactome	R-HSA-166520	PIK3CA; PTPN11; NRAS; REST; MAPK1; CREB1; CLTC; ATF2	1386; 5594; 1385; 5978; 5781; 4893; 1213; 5290	127	127
0.00361268	0.00706481	MAPK family signaling cascades	8	Reactome	R-HSA-5683057	CSF2RB; PPP1CC; IL2RG; PIK3CA; NRAS; MAPK1; JAK3; JAK1; LAT	5501; 5594; 1439; 3718; 3716; 27040; 4893; 3561; 5290	270	270
2.8179e-07	4.95951e-06	Cytosolic sensors of pathogen-associated DNA	7	Reactome	R-HSA-1834949	DHX9; TBK1; ZBP1; PRKDC; CTNNB1; IFI16; DHX36	29110; 3428; 1499; 5591; 1660; 81030; 170506	40	40
2.56239e-05	0.000241597	MyD88 cascade initiated on plasma membrane	7	Reactome	R-HSA-975871	MAP3K1; CREB1; TLR10; MAPK1; NOD1; TLR5; ATF2	10392; 4214; 1386; 1385; 5594; 81793; 7100	77	77
7.55844e-05	0.000498857	MyD88:MAL(TIRAP) cascade initiated on plasma membrane	7	Reactome	R-HSA-166058	MAP3K1; CREB1; CD14; MAPK1; NOD1; BTK; ATF2	929; 1386; 5594; 1385; 10392; 4214; 695	91	91
8.10424e-05	0.000521834	VEGFA-VEGFR2 Pathway	7	Reactome	R-HSA-4420097	SPHK1; PRKCA; PIK3CA; NRAS; ITGAV; CTNNB1; ITPR3	5578; 3710; 1499; 8877; 4893; 3685; 5290	92	92
0.000137344	0.000771464	Signaling by VEGF	7	Reactome	R-HSA-194138	SPHK1; PRKCA; PIK3CA; NRAS; ITGAV; CTNNB1; ITPR3	5578; 3710; 1499; 8877; 4893; 3685; 5290	100	100
0.000309512	0.001297	Signaling by NTRK1 (TRKA)	7	Reactome	R-HSA-187037	PIK3CA; NRAS; REST; MAPK1; CREB1; CLTC; ATF2	1386; 1385; 5594; 5978; 4893; 1213; 5290	114	114
0.000515506	0.00194419	Cell-Cell communication	7	Reactome	R-HSA-1500931	ITGB1; SIRPA; PIK3CA; PTPN11; CTNNB1; VASP; PTPN6	140885; 7408; 5781; 5777; 1499; 5290; 3688	124	124
0.000567466	0.00200491	Signaling by the B Cell Receptor (BCR)	7	Reactome	R-HSA-983705	PPP3R1; PIK3CD; NRAS; PTPN6; ITPR3; BCL10; BTK	3710; 5534; 8915; 5777; 5293; 4893; 695	126	126
0.00460892	0.00838438	Downstream signal transduction	7	Reactome	R-HSA-186763	PIK3CA; PTPN11; NRAS	5781; 4893; 5290	30	30
0.00659442	0.0108132	Integrin cell surface interactions	7	Reactome	R-HSA-216083	ITGB1; ITGA3; SPP1; ITGAV	3675; 6696; 3685; 3688	66	66
0.0468161	0.0614898	Deubiquitination	7	Reactome	R-HSA-5688426	TRAF2; BECN1; TNIP3; NOD1; SKP2; CYLD; GATA3	1540; 8678; 79931; 2625; 6502; 10392; 7186	290	290
8.20199e-06	9.41446e-05	Signaling by SCF-KIT	6	Reactome	R-HSA-1433557	PRKCA; PIK3CA; PTPN11; NRAS; CBL; PTPN6	867; 5578; 5777; 5781; 4893; 5290	43	43
1.22546e-05	0.000134801	Signaling by MET	6	Reactome	R-HSA-6806834	ITGB1; PIK3CA; PTPN11; NRAS; CBL; PTPN2	867; 5781; 4893; 5771; 5290; 3688	46	46
1.57586e-05	0.000166411	Signaling by EGFR	6	Reactome	R-HSA-177929	PIK3CA; PTPN11; NRAS; CBL; ADAM10; ADAM17	6868; 867; 102; 5781; 4893; 5290	48	48
0.000173293	0.000914988	Extra-nuclear estrogen signaling	6	Reactome	R-HSA-9009391	SPHK1; PIK3CA; PRMT1; NRAS; CREB1; MAPK1	5594; 8877; 1385; 4893; 3276; 5290	73	73
0.000682435	0.00228054	Beta-catenin independent WNT signaling	6	Reactome	R-HSA-3858494	FZD1; PPP3R1; PRKCA; CTNNB1; CLTC; ITPR3	5578; 3710; 5534; 8321; 1499; 1213	94	94
0.00127988	0.00371306	PI3K/AKT Signaling in Cancer	6	Reactome	R-HSA-2219528	GSK3A; PTPN11; PIK3CD; CREB1; GSK3B; PIK3CA	1385; 2931; 5781; 2932; 5293; 5290	106	106
9.36727e-05	0.0005888	Signaling by FGFR3	5	Reactome	R-HSA-5654741	PIK3CA; PTPN11; MAPK1; NRAS; CBL	867; 5781; 4893; 5594; 5290	41	41
0.000105369	0.000632211	Signaling by FGFR4	5	Reactome	R-HSA-5654743	PIK3CA; PTPN11; MAPK1; NRAS; CBL	867; 5781; 4893; 5594; 5290	42	42
0.000268125	0.00122043	Signaling by FGFR1	5	Reactome	R-HSA-5654736	PIK3CA; PTPN11; MAPK1; NRAS; CBL	867; 5781; 4893; 5594; 5290	51	51
0.00149314	0.00406381	Signaling by FGFR2	5	Reactome	R-HSA-5654738	PIK3CA; PTPN11; MAPK1; NRAS; CBL	867; 5781; 4893; 5594; 5290	74	74
0.00320091	0.00662418	Signaling by FGFR	5	Reactome	R-HSA-190236	PIK3CA; PTPN11; MAPK1; NRAS; CBL	5594; 867; 5781; 4893; 5290	88	88
0.00553862	0.00949477	Negative regulation of FGFR4 signaling	5	Reactome	R-HSA-5654733	PTPN11; MAPK1; CBL	867; 5781; 5594	32	32
3.19075e-05	0.000290469	GPVI-mediated activation cascade	5	Reactome	R-HSA-114604	LAT; PIK3CA; PTPN11; PTPN6; PIK3CG	5294; 5777; 5781; 27040; 5290	33	33
0.000200841	0.00100042	Nucleotide-binding domain, leucine rich repeat containing receptor (NLR) signaling pathways	5	Reactome	R-HSA-168643	CYLD; CASP1; NOD1; CASP2; BCL2	596; 10392; 1540; 835; 834	48	48
0.000351282	0.00142675	Signaling by PDGF	5	Reactome	R-HSA-186797	PLG; SPP1; PTPN11; NRAS; PIK3CA	5340; 5781; 4893; 6696; 5290	54	54
0.000351282	0.00142675	Insulin receptor signalling cascade	5	Reactome	R-HSA-74751	PIK3CA; PTPN11; MAPK1; NRAS; PIK3C3	5781; 5594; 5289; 4893; 5290	54	54
0.00140488	0.00393287	TCR signaling	5	Reactome	R-HSA-202403	LAT; PIK3CA; VASP; INPP5D; BCL10	7408; 27040; 3635; 8915; 5290	73	73
0.00178247	0.00465913	TRAF6 mediated induction of NFkB and MAP kinases upon TLR7/8 or 9 activation	5	Reactome	R-HSA-975138	MAP3K1; MAPK1; NOD1; CREB1; ATF2	10392; 5594; 1386; 4214; 1385	77	77
0.00188746	0.00474561	Signaling by Insulin receptor	5	Reactome	R-HSA-74752	MAPK1; PTPN11; PIK3C3; NRAS; PIK3CA	5289; 5781; 4893; 5594; 5290	78	78
0.00188746	0.00474561	MyD88 dependent cascade initiated on endosome	5	Reactome	R-HSA-975155	MAPK1; MAP3K1; NOD1; CREB1; ATF2	10392; 4214; 5594; 1386; 1385	78	78
0.00261489	0.00600288	PI Metabolism	5	Reactome	R-HSA-1483255	INPP5D; PIK3C3; PIK3CD; PIK3CA; PIK3CG	5294; 5289; 5293; 3635; 5290	84	84
0.00365708	0.00709904	G alpha (q) signalling events	5	Reactome	R-HSA-416476	PRKCA; PIK3CA; NRAS; CREB1; MAPK1; EDN1; ITPR3; BTK	5578; 1385; 5594; 4893; 1906; 3710; 695; 5290	221	221
0.0133282	0.0199899	Regulation of Insulin-like Growth Factor (IGF) transport and uptake by Insulin-like Growth Factor Binding Proteins (IGFBPs)	5	Reactome	R-HSA-381426	PLG; ADAM10; SPP1; AHSG; MFGE8	4240; 6696; 5340; 102; 197	124	124
0.0197002	0.0285761	Complement cascade	5	Reactome	R-HSA-166658	CD81; C1S; C8B; GZMM; C8A	975; 732; 716; 731; 3004	137	137
0.0226044	0.0320837	Estrogen-dependent gene expression	5	Reactome	R-HSA-9018519	HDAC1; PRMT1; BCL2; GATA3; ATF2	3065; 1386; 2625; 596; 3276	143	142
0.0244736	0.0343671	Factors involved in megakaryocyte development and platelet production	5	Reactome	R-HSA-983231	HDAC1; VPS45; MFN1; GATA3; AKAP10	3065; 11311; 2625; 55669; 11216	145	145
0.00340365	0.00681555	Downstream signaling of activated FGFR4	4	Reactome	R-HSA-5654716	PIK3CA; PTPN11; NRAS	5781; 4893; 5290	27	27
0.00657302	0.0108132	Negative regulation of FGFR1 signaling	4	Reactome	R-HSA-5654726	PTPN11; MAPK1; CBL	867; 5781; 5594	34	34
7.2668e-06	9.13541e-05	PECAM1 interactions	4	Reactome	R-HSA-210990	PTPN11; INPP5D; PTPN6; ITGAV	5781; 3635; 5777; 3685	12	12
5.34927e-05	0.000427942	Gastrin-CREB signalling pathway via PKC and MAPK	4	Reactome	R-HSA-881907	PRKCA; MAPK1; NRAS; CREB1	5594; 5578; 4893; 1385	19	19
6.62792e-05	0.000498857	VEGFR2 mediated cell proliferation	4	Reactome	R-HSA-5218921	PRKCA; ITPR3; SPHK1; NRAS	4893; 8877; 3710; 5578	20	20
0.000165598	0.000910789	Signaling by Erythropoietin	4	Reactome	R-HSA-9006335	NRAS; PIK3CD; PIK3CA; PIK3CG	5294; 5293; 4893; 5290	25	25
0.000300174	0.00127816	DAP12 signaling	4	Reactome	R-HSA-2424491	LAT; PIK3CA; NRAS; BTK	27040; 4893; 695; 5290	29	29
0.00044266	0.00174421	FLT3 Signaling	4	Reactome	R-HSA-9607240	PIK3CA; PTPN11; NRAS; CBL	867; 5781; 4893; 5290	32	32
0.000560948	0.00200491	NOD1/2 Signaling Pathway	4	Reactome	R-HSA-168638	CYLD; NOD1; CASP2; CASP1	10392; 1540; 835; 834	34	34
0.00163673	0.00432098	DAP12 interactions	4	Reactome	R-HSA-2172127	LAT; PIK3CA; NRAS; BTK	27040; 4893; 5290; 695	45	45
0.00208222	0.00508986	IRS-mediated signalling	4	Reactome	R-HSA-112399	PIK3CA; PTPN11; PIK3C3; NRAS	5289; 5781; 4893; 5290	48	48
0.00242182	0.00560843	PLC beta mediated events	4	Reactome	R-HSA-112043	PRKCA; ITPR3; MAPK1; CREB1	5578; 3710; 5594; 1385	50	50
0.00242182	0.00560843	Signaling by ERBB2	4	Reactome	R-HSA-1227986	PRKCA; PIK3CA; NRAS; RNF41	5578; 4893; 10193; 5290	50	50
0.00279771	0.00625929	IRS-related events triggered by IGF1R	4	Reactome	R-HSA-2428928	PIK3CA; PTPN11; PIK3C3; NRAS	5289; 5781; 4893; 5290	52	52
0.00299984	0.00654511	IGF1R signaling cascade	4	Reactome	R-HSA-2428924	PIK3CA; PTPN11; PIK3C3; NRAS	5289; 5781; 4893; 5290	53	53
0.00299984	0.00654511	Signaling by Type 1 Insulin-like Growth Factor 1 Receptor (IGF1R)	4	Reactome	R-HSA-2404192	PIK3CA; PTPN11; PIK3C3; NRAS	5289; 5781; 4893; 5290	53	53
0.00299984	0.00654511	Synthesis of PIPs at the plasma membrane	4	Reactome	R-HSA-1660499	INPP5D; PIK3CD; PIK3CA; PIK3CG	5294; 5293; 3635; 5290	53	53
0.00321172	0.00662418	Constitutive Signaling by NOTCH1 HD+PEST Domain Mutants	4	Reactome	R-HSA-2894862	HDAC11; HDAC1; ADAM10; ADAM17	6868; 79885; 3065; 102	54	54
0.00321172	0.00662418	Constitutive Signaling by NOTCH1 PEST Domain Mutants	4	Reactome	R-HSA-2644606	HDAC11; HDAC1; ADAM10; ADAM17	6868; 79885; 3065; 102	54	54
0.00321172	0.00662418	Signaling by NOTCH1 PEST Domain Mutants in Cancer	4	Reactome	R-HSA-2644602	HDAC11; HDAC1; ADAM10; ADAM17	6868; 79885; 3065; 102	54	54
0.00321172	0.00662418	Signaling by NOTCH1 HD+PEST Domain Mutants in Cancer	4	Reactome	R-HSA-2894858	HDAC11; HDAC1; ADAM10; ADAM17	6868; 79885; 3065; 102	54	54
0.00343359	0.00681555	Ca2+ pathway	4	Reactome	R-HSA-4086398	PRKCA; CTNNB1; PPP3R1; ITPR3	5534; 5578; 1499; 3710	55	55
0.00468714	0.00838438	Signaling by WNT	4	Reactome	R-HSA-195721	HDAC1; FZD1; PPP3R1; PRKCA; GSK3B; CTNNB1; CLTC; ITPR3; SMARCA4	3065; 5578; 6597; 3710; 5534; 8321; 1213; 2932; 1499	282	281
0.00470033	0.00838438	Regulation of PTEN gene transcription	4	Reactome	R-HSA-8943724	HDAC1; EZH2; REST; ATF2	2146; 1386; 5978; 3065	60	60
0.00498666	0.00877652	Nuclear Events (kinase and transcription factor activation)	4	Reactome	R-HSA-198725	MAPK1; CREB1; REST; ATF2	1386; 5978; 5594; 1385	61	61
0.00604255	0.0102258	Downstream signaling events of B Cell Receptor (BCR)	4	Reactome	R-HSA-1168372	NRAS; BCL10; PPP3R1	8915; 5534; 4893	33	33
0.00624873	0.01038	MAP kinase activation	4	Reactome	R-HSA-450294	MAPK1; NOD1; CREB1; ATF2	10392; 1386; 1385; 5594	65	65
0.00770696	0.0123311	Oncogenic MAPK signaling	4	Reactome	R-HSA-6802957	AP3B1; MAPK1; NRAS; PPP1CC	5501; 8546; 5594; 4893	69	69
0.00982332	0.015255	Signaling by NOTCH1	4	Reactome	R-HSA-1980143	HDAC11; HDAC1; ADAM10; ADAM17	6868; 79885; 3065; 102	74	74
0.0151109	0.0224116	C-type lectin receptors (CLRs)	4	Reactome	R-HSA-5621481	ITPR3; NRAS; BCL10; PPP3R1	8915; 5534; 3710; 4893	84	84
0.0211631	0.0302003	PTEN Regulation	4	Reactome	R-HSA-6807070	HDAC1; EZH2; REST; ATF2	3065; 2146; 1386; 5978	93	93
0.0234668	0.0331297	p75 NTR receptor-mediated signalling	4	Reactome	R-HSA-193704	HDAC1; SQSTM1; CASP2; ADAM17	3065; 6868; 835; 8878	96	96
0.0267671	0.037389	PI5P, PP2A and IER3 Regulate PI3K/AKT Signaling	4	Reactome	R-HSA-6811558	PIK3CA; PTPN11; MAPK1; PIK3CD	5594; 5781; 5293; 5290	100	100
0.0322151	0.0442957	Macroautophagy	4	Reactome	R-HSA-1632852	SQSTM1; MFN1; PIK3C3; BECN1	5289; 8678; 55669; 8878	106	106
0.0331817	0.0449229	Post-translational protein phosphorylation	4	Reactome	R-HSA-8957275	ADAM10; SPP1; AHSG; MFGE8	4240; 6696; 102; 197	107	107
0.0331817	0.0449229	Negative regulation of the PI3K/AKT network	4	Reactome	R-HSA-199418	PIK3CA; PTPN11; MAPK1; PIK3CD	5594; 5781; 5293; 5290	107	107
0.0341651	0.0457848	FCERI mediated MAPK activation	4	Reactome	R-HSA-2871796	LAT; MAP3K1; MAPK1; NRAS	5594; 27040; 4893; 4214	108	108
0.0341651	0.0457848	FCERI mediated Ca+2 mobilization	4	Reactome	R-HSA-2871809	LAT; ITPR3; BTK; PPP3R1	27040; 5534; 3710; 695	108	108
0.0393358	0.0524477	Autophagy	4	Reactome	R-HSA-9612973	SQSTM1; MFN1; PIK3C3; BECN1	5289; 8678; 55669; 8878	113	113
0.00272094	0.00613956	Downstream signaling of activated FGFR3	3	Reactome	R-HSA-5654708	PIK3CA; PTPN11; NRAS	5781; 4893; 5290	25	25
0.00460892	0.00838438	Negative regulation of FGFR3 signaling	3	Reactome	R-HSA-5654732	PTPN11; MAPK1; CBL	867; 5781; 5594	30	30
0.00460892	0.00838438	Downstream signaling of activated FGFR2	3	Reactome	R-HSA-5654696	PIK3CA; PTPN11; NRAS	5781; 4893; 5290	30	30
0.00713039	0.0114782	Negative regulation of FGFR2 signaling	3	Reactome	R-HSA-5654727	PTPN11; MAPK1; CBL	867; 5781; 5594	35	35
0.00021923	0.0010523	Activation of IRF3/IRF7 mediated by TBK1/IKK epsilon	3	Reactome	R-HSA-936964	CD14; TBK1; IKBKE	929; 29110; 9641	11	11
0.000289884	0.00125458	Erythropoietin activates Phosphoinositide-3-kinase (PI3K)	3	Reactome	R-HSA-9027276	PIK3CA; PIK3CD; PIK3CG	5294; 5290; 5293	12	12
0.000373728	0.00149491	Signal regulatory protein family interactions	3	Reactome	R-HSA-391160	PTPN11; PTPN6; SIRPA	5781; 140885; 5777	13	13
0.000584766	0.00200491	Constitutive Signaling by Ligand-Responsive EGFR Cancer Variants	3	Reactome	R-HSA-1236382	PIK3CA; NRAS; CBL	867; 5290; 4893	15	15
0.000584766	0.00200491	Signaling by Ligand-Responsive EGFR Variants in Cancer	3	Reactome	R-HSA-5637815	PIK3CA; NRAS; CBL	867; 5290; 4893	15	15
0.000584766	0.00200491	Signaling by FLT3 ITD and TKD mutants	3	Reactome	R-HSA-9703648	PIK3CA; PTPN11; NRAS	5781; 5290; 4893	15	15
0.000713761	0.00235541	Regulation of KIT signaling	3	Reactome	R-HSA-1433559	PRKCA; PTPN6; CBL	867; 5777; 5578	16	16
0.00102293	0.0030688	Regulation of signaling by CBL	3	Reactome	R-HSA-912631	PIK3CA; PIK3CD; CBL	867; 5290; 5293	18	18
0.00102293	0.0030688	Tie2 Signaling	3	Reactome	R-HSA-210993	PIK3CA; PTPN11; NRAS	5781; 5290; 4893	18	18
0.0014056	0.00393287	Syndecan interactions	3	Reactome	R-HSA-3000170	ITGB1; PRKCA; ITGAV	3688; 5578; 3685	20	20
0.00162634	0.00432098	Signaling by EGFR in Cancer	3	Reactome	R-HSA-1643713	PIK3CA; NRAS; CBL	867; 5290; 4893	21	21
0.00162634	0.00432098	FLT3 signaling in disease	3	Reactome	R-HSA-9682385	PIK3CA; PTPN11; NRAS	5781; 5290; 4893	21	21
0.00186761	0.00474561	Signal transduction by L1	3	Reactome	R-HSA-445144	ITGB1; MAPK1; ITGAV	5594; 3685; 3688	22	22
0.00213006	0.00515903	Laminin interactions	3	Reactome	R-HSA-3000157	ITGB1; ITGA3; ITGAV	3675; 3685; 3688	23	23
0.0024143	0.00560843	RHO GTPases Activate NADPH Oxidases	3	Reactome	R-HSA-5668599	PRKCA; MAPK1; PIK3C3	5578; 5289; 5594	24	24
0.00321172	0.00662418	Signaling by NOTCH1 in Cancer	3	Reactome	R-HSA-2644603	HDAC11; HDAC1; ADAM10; ADAM17	6868; 79885; 3065; 102	54	54
0.00340365	0.00681555	Transcriptional regulation of granulopoiesis	3	Reactome	R-HSA-9616222	FLI1; CREB1; CEBPE	1053; 1385; 2313	27	27
0.00340365	0.00681555	Constitutive Signaling by AKT1 E17K in Cancer	3	Reactome	R-HSA-5674400	GSK3A; CREB1; GSK3B	2932; 2931; 1385	27	27
0.0036986	0.00712722	Opioid Signalling	3	Reactome	R-HSA-111885	PRKCA; ITPR3; MAPK1; PPP3R1; CREB1	5578; 5594; 1385; 5534; 3710	91	91
0.00378076	0.00718072	Recycling pathway of L1	3	Reactome	R-HSA-437239	MAPK1; RPS6KA4; CLTC	8986; 5594; 1213	28	28
0.00418236	0.00783081	Disassembly of the destruction complex and recruitment of AXIN to the membrane	3	Reactome	R-HSA-4641262	CTNNB1; FZD1; GSK3B	2932; 1499; 8321	29	29
0.00418236	0.00783081	TRAF6 mediated IRF7 activation	3	Reactome	R-HSA-933541	TRAF2; TBK1; IKBKE	29110; 9641; 7186	29	29
0.00460892	0.00838438	CREB1 phosphorylation through NMDA receptor-mediated activation of RAS signaling	3	Reactome	R-HSA-442742	MAPK1; NRAS; CREB1	5594; 4893; 1385	30	30
0.00506087	0.00878993	MAPK targets/ Nuclear events mediated by MAP kinases	3	Reactome	R-HSA-450282	MAPK1; CREB1; ATF2	1386; 5594; 1385	31	31
0.00537	0.00926589	Extracellular matrix organization	3	Reactome	R-HSA-1474244	ITGB1; ADAM10; CTSK; PRKCA; ITGA3; ITGAV; PLG; SPP1; ADAM17	5578; 6868; 3685; 3675; 6696; 5340; 102; 1513; 3688	287	287
0.00600165	0.0102222	L1CAM interactions	3	Reactome	R-HSA-373760	ITGB1; MAPK1; RPS6KA4; CLTC; ITGAV	8986; 5594; 3685; 1213; 3688	102	102
0.00625159	0.01038	Degradation of the extracellular matrix	3	Reactome	R-HSA-1474228	PLG; ADAM10; CTSK; SPP1; ADAM17	6868; 6696; 5340; 102; 1513	103	103
0.00673407	0.010974	Transcriptional regulation by RUNX1	3	Reactome	R-HSA-8878171	HDAC1; CTSK; PTPN11; PRMT1; SMARCE1; SMARCA4; GATA3	3065; 6597; 2625; 5781; 3276; 6605; 1513	196	195
0.00713039	0.0114782	Collagen degradation	3	Reactome	R-HSA-1442490	ADAM10; CTSK; ADAM17	6868; 102; 1513	35	35
0.00896688	0.0141752	Degradation of beta-catenin by the destruction complex	3	Reactome	R-HSA-195253	CTNNB1; HDAC1; GSK3B	2932; 1499; 3065	38	38
0.00963477	0.0150766	Ca-dependent events	3	Reactome	R-HSA-111996	PRKCA; MAPK1; CREB1	5578; 5594; 1385	39	39
0.0103309	0.0159495	NGF-stimulated transcription	3	Reactome	R-HSA-9031628	CREB1; REST; ATF2	1386; 5978; 1385	40	40
0.0110556	0.016969	CLEC7A (Dectin-1) signaling	3	Reactome	R-HSA-5607764	ITPR3; BCL10; PPP3R1	5534; 8915; 3710	41	41
0.0118089	0.017917	Non-integrin membrane-ECM interactions	3	Reactome	R-HSA-3000171	PRKCA; ITGB1; ITGAV	3685; 5578; 3688	42	42
0.0118089	0.017917	DAG and IP3 signaling	3	Reactome	R-HSA-1489509	PRKCA; ITPR3; CREB1	5578; 3710; 1385	42	42
0.0134023	0.0199899	PI3K Cascade	3	Reactome	R-HSA-109704	PIK3CA; PTPN11; PIK3C3	5781; 5289; 5290	44	44
0.0160116	0.0234836	PCP/CE pathway	3	Reactome	R-HSA-4086400	PRKCA; FZD1; CLTC	5578; 1213; 8321	47	47
0.0209511	0.0300603	Downstream TCR signaling	3	Reactome	R-HSA-202424	PIK3CA; INPP5D; BCL10	3635; 8915; 5290	52	52
0.02786	0.0387107	Signaling by ERBB4	3	Reactome	R-HSA-1236394	PIK3CA; NRAS; ADAM17	6868; 4893; 5290	58	58
0.0291154	0.0402433	NCAM signaling for neurite out-growth	3	Reactome	R-HSA-375165	MAPK1; NRAS; CREB1	4893; 5594; 1385	59	59
0.0330588	0.0449229	Post NMDA receptor activation events	3	Reactome	R-HSA-438064	MAPK1; NRAS; CREB1	5594; 4893; 1385	62	62
0.0417342	0.055366	Signaling by TGF-beta Receptor Complex	3	Reactome	R-HSA-170834	HDAC1; PPP1CC; CBL	867; 3065; 5501	68	68
0.0497501	0.0646997	Transcriptional regulation by RUNX2	3	Reactome	R-HSA-8878166	MAPK1; SKP2; GSK3B	2932; 6502; 5594	73	73
