# Supplementary material for: Comprehensive Analysis of TRIM Family Genes in Hepatitis Virus B-Related Hepatoma Carcinoma
Source: Front Genet. 2022 Jul 7;13:913743. doi: 10.3389/fgene.2022.913743 (PMC9301387; doi:10.3389/fgene.2022.913743)
Supplement: Supplementary file 4 [file Table1.XLSX]

## Sheet: ORA_results
p-value	q-value	term_goid	term_category	term_level	term_name	Number	members_input_overlap	members_input_overlap_geneids	size	effective_size
0.00466142	0.0752118	GO:0044237	b	2	cellular metabolic process	15	4591; 10626; 11074; 131405; 80263; 57159; 201292; 135892; 117854; 55223; 91107; 22954; 286827; 51127; 81786	TRIM17; TRIM71; TRIM16; TRIM32; TRIM31; TRIM37; TRIM50; TRIM59; TRIM47; TRIM54; TRIM62; TRIM45; TRIM65; TRIM7; TRIM6	10863	10848
0.0124851	0.0752118	GO:0006807	b	2	nitrogen compound metabolic process	14	4591; 10626; 11074; 131405; 80263; 57159; 135892; 117854; 55223; 91107; 22954; 286827; 51127; 81786	TRIM17; TRIM71; TRIM16; TRIM32; TRIM31; TRIM37; TRIM59; TRIM47; TRIM54; TRIM62; TRIM45; TRIM50; TRIM7; TRIM6	10378	10363
0.020283	0.101415	GO:0044238	b	2	primary metabolic process	14	4591; 10626; 11074; 131405; 80263; 57159; 135892; 117854; 55223; 91107; 22954; 286827; 51127; 81786	TRIM17; TRIM71; TRIM16; TRIM32; TRIM31; TRIM37; TRIM59; TRIM47; TRIM54; TRIM62; TRIM45; TRIM50; TRIM7; TRIM6	10846	10831
0.0295681	0.109041	GO:0071704	b	2	organic substance metabolic process	14	4591; 10626; 11074; 131405; 80263; 57159; 135892; 117854; 55223; 91107; 22954; 286827; 51127; 81786	TRIM17; TRIM71; TRIM16; TRIM32; TRIM31; TRIM37; TRIM59; TRIM47; TRIM54; TRIM62; TRIM45; TRIM50; TRIM7; TRIM6	11233	11218
0.0128935	0.0752118	GO:0006955	b	2	immune response	6	11074; 117854; 55223; 22954; 286827; 51127	TRIM17; TRIM32; TRIM31; TRIM59; TRIM62; TRIM6	2409	2406
0.0110326	0.0752118	GO:0044419	b	2	interspecies interaction between organisms	4	11074; 117854; 55223; 22954	TRIM32; TRIM31; TRIM62; TRIM6	1043	1043
3.22973e-06	0.000113041	GO:0052192	b	2	movement in environment of other organism involved in symbiotic interaction	3	11074; 55223; 22954	TRIM32; TRIM31; TRIM62	34	34
0.0108332	0.0752118	GO:0061919	b	2	process utilizing autophagic mechanism	3	201292; 117854; 51127	TRIM65; TRIM17; TRIM6	542	542
0.0253444	0.109041	GO:0001816	b	2	cytokine production	3	10626; 117854; 22954	TRIM32; TRIM6; TRIM16	746	746
0.0311547	0.109041	GO:0007017	b	2	microtubule-based process	3	4591; 80128; 57159	TRIM46; TRIM54; TRIM37	808	808
0.00926949	0.0560654	GO:0044424	c	2	intracellular part	17	4591; 10626; 11074; 131405; 80128; 80263; 57159; 201292; 147166; 135892; 117854; 55223; 91107; 22954; 286827; 51127; 81786	TRIM17; TRIM71; TRIM16; TRIM16L; TRIM32; TRIM31; TRIM37; TRIM50; TRIM59; TRIM47; TRIM46; TRIM54; TRIM62; TRIM45; TRIM65; TRIM7; TRIM6	14850	14822
0.00934424	0.0560654	GO:0005622	c	2	intracellular	17	4591; 10626; 11074; 131405; 80128; 80263; 57159; 201292; 147166; 135892; 117854; 55223; 91107; 22954; 286827; 51127; 81786	TRIM17; TRIM71; TRIM16; TRIM16L; TRIM32; TRIM31; TRIM37; TRIM50; TRIM59; TRIM47; TRIM46; TRIM54; TRIM62; TRIM45; TRIM65; TRIM7; TRIM6	14857	14829
0.0153877	0.0615508	GO:0044449	c	2	contractile fiber part	2	57159; 22954	TRIM54; TRIM32	220	220
1.70545e-07	4.54786e-07	GO:0043167	m	2	ion binding	16	4591; 10626; 11074; 131405; 80128; 80263; 57159; 201292; 135892; 117854; 55223; 91107; 22954; 286827; 51127; 81786	TRIM17; TRIM71; TRIM16; TRIM32; TRIM31; TRIM37; TRIM50; TRIM59; TRIM47; TRIM46; TRIM54; TRIM62; TRIM45; TRIM65; TRIM7; TRIM6	6337	6320
3.74538e-11	2.9963e-10	GO:0016740	m	2	transferase activity	14	4591; 10626; 11074; 131405; 80263; 57159; 135892; 117854; 55223; 91107; 22954; 286827; 51127; 81786	TRIM17; TRIM71; TRIM16; TRIM32; TRIM31; TRIM37; TRIM59; TRIM47; TRIM54; TRIM62; TRIM45; TRIM50; TRIM7; TRIM6	2267	2265
7.84923e-10	3.13969e-09	GO:0140096	m	2	catalytic activity, acting on a protein	13	4591; 11074; 131405; 80263; 57159; 135892; 117854; 55223; 91107; 22954; 286827; 51127; 81786	TRIM17; TRIM71; TRIM32; TRIM31; TRIM37; TRIM59; TRIM47; TRIM54; TRIM62; TRIM45; TRIM50; TRIM7; TRIM6	2220	2219
0.000742326	0.00148465	GO:0003712	m	2	transcription coregulator activity	4	4591; 11074; 55223; 22954	TRIM32; TRIM31; TRIM37; TRIM62	494	494
0.020023	0.0320368	GO:0060090	m	2	molecular adaptor activity	2	117854; 51127	TRIM17; TRIM6	253	253
